# Supplementary material
Source: HighWire-hosted journal article supplement (https://www.annfammed.org/highwire/filestream/15875/field_highwire_adjunct_files/0/DoubeniImpactSuppApp.pdf)
Supplement: DoubeniImpactSuppApp.pdf [file DoubeniImpactSuppApp.pdf]

**Supplemental materials for  
Klusaritz H, Bilger A, Paterson E, et al. Impact of stigma on clinician training for  
opioid use disorder care: a qualitative study in a primary care learning  
collaborative. *Ann Fam Med.* 2023;21(Suppl 2):S31-S38.**

**Supplemental Appendix**

MAT Evaluation  
Interview Guide

---

Thank you for agreeing to talk with me today about your project's experience conducting research to implement an MAT curriculum. As you may know, we are tasked with evaluating the project overall and we would like to understand what are the larger lessons that we can learn from engaging in the project activities that are planned. In particular, we would like to learn about what is necessary to successfully implement an MAT curriculum in diverse settings across the country. When we say "implement an MAT curriculum" we are referring to all of the practices, procedures, policies, staffing decisions and changes that are being used to get this done. To that end, we would like to learn from your experience. We will do this now and we may contact you again in about six months so that we can learn about how barriers and facilitators change over time. I would like to record our conversation so that I can have the information transcribed. Once it is transcribed, we will enter it into NVivo qualitative software for coding and analysis. Do you have any questions about this interview? I would like to begin.

1. First, I'd like for you to briefly describe your MAT program.
2. Who would you say are the stakeholders for your curriculum? By that, I mean who are all the people who are involved in the development and implementation of your MAT curriculum?
3. This question relates to the curriculum that you are trying to implement. As you proceed with your project, how do you think that stakeholders perceive this curriculum?
  - a) Please describe how you developed your curriculum. Is there a particular framework or model that you used?
  - b) What do you think is unique about your program? Please explain
  - c) What are the components of the program that you think work well? Please explain
  - d) What are the components of the program that you think do not work well? Please explain
4. What are the broader policies outside of the institution that affect implementation of your intervention?
  - a) Are there competing interventions or programs that may affect whether the curriculum is successful? These can be internal or external. If yes, please explain.
5. Now I would like to talk about the settings in which your program takes place.
  - a) What program characteristics affect how the curriculum is implemented?
  - b) How do people communicate about the intervention within the program setting?
  - c) How would you describe the level of openness to change within your program setting?
  - d) What role does the program leadership play in the implementation of the curriculum?
  - e) How well resourced is your program setting for the intervention where you are trying to implement the curriculum?
  - f) What is particular about YOUR environment that affects implementation of your curriculum? (what are the barriers and facilitators?)
6. What are the impressions that clinicians/educators have about MAT that may affect implementation of the curriculum?
  - a. What personal characteristics of the clinicians/educators seem to affect implementation?
7. Who are the leaders of change in your program setting?
8. What other factors do you feel affect successful implementation of your curriculum?
9. How will you know if your curriculum has been successful?
